# Supplementary material
Source: PubMed Central journal article supplement (PMC4933607)
Supplement: supp_4.2.E346_2015-0131-1-at.pdf [file supp_4.2.E346_2015-0131-1-at.pdf]

| <b>Appendix 1 (as supplied by the authors): Summary of Beers List Drugs Included in this Study</b> |                                                                                            |                            |
|----------------------------------------------------------------------------------------------------|--------------------------------------------------------------------------------------------|----------------------------|
| <b>Group</b>                                                                                       |                                                                                            | <b>Drugs</b>               |
| Anticholinergics<br>(excludes TCAs)                                                                | First-generation antihistamines<br>(as single agent or as part of<br>combination products) | Brompheniramine            |
|                                                                                                    |                                                                                            | Carbinoxamine              |
|                                                                                                    |                                                                                            | Chlorpheniramine           |
|                                                                                                    |                                                                                            | Clemastine                 |
|                                                                                                    |                                                                                            | Cyproheptadine             |
|                                                                                                    |                                                                                            | Dexbrompheniramine         |
|                                                                                                    |                                                                                            | Dexchlorpheniramine        |
|                                                                                                    |                                                                                            | Diphenhydramine            |
|                                                                                                    |                                                                                            | Doxylamine                 |
|                                                                                                    |                                                                                            | Hydroxyzine                |
|                                                                                                    |                                                                                            | Promethazine               |
|                                                                                                    |                                                                                            | Tripolidine                |
|                                                                                                    | Antiparkinson agents                                                                       | Benzotropine               |
|                                                                                                    |                                                                                            | Trihexyphenidyl            |
|                                                                                                    | Antispasmodics                                                                             | Belladonna alkaloids       |
|                                                                                                    |                                                                                            | Clidinium-chlordiazepoxide |
|                                                                                                    |                                                                                            | Dicyclomine                |
|                                                                                                    |                                                                                            | Hyoscyamine                |
|                                                                                                    |                                                                                            | Propantheline              |
|                                                                                                    | Scopolamine                                                                                |                            |
| Antithrombotics                                                                                    |                                                                                            | Dipyridamole               |
|                                                                                                    |                                                                                            | Ticlopidine                |
| Anti-infective                                                                                     |                                                                                            | Nitrofurantoin             |
| Cardiovascular                                                                                     | Alpha1 blockers                                                                            | Doxazosin                  |
|                                                                                                    |                                                                                            | Prazosin                   |
|                                                                                                    |                                                                                            | Terazosin                  |
|                                                                                                    | Alpha agonists, central                                                                    | Clonidine                  |
|                                                                                                    |                                                                                            | Guanabenz                  |
|                                                                                                    |                                                                                            | Guanfacine                 |
|                                                                                                    |                                                                                            | Methyldopa                 |
|                                                                                                    |                                                                                            | Reserpine                  |
|                                                                                                    | Antiarrhythmic drugs (Class Ia,<br>Ic, III)                                                | Amiodarone                 |
|                                                                                                    |                                                                                            | Dofetilide                 |
|                                                                                                    |                                                                                            | Dronedarone                |
|                                                                                                    |                                                                                            | Flecainide                 |
|                                                                                                    |                                                                                            | Ibutilide                  |
|                                                                                                    |                                                                                            | Procainamide               |
|                                                                                                    |                                                                                            | Propafenone                |
|                                                                                                    |                                                                                            | Quinidine                  |
|                                                                                                    | Sotalol                                                                                    |                            |
|                                                                                                    | Disopyramide                                                                               |                            |

|                        |                                                                                                                                           |                                |
|------------------------|-------------------------------------------------------------------------------------------------------------------------------------------|--------------------------------|
|                        |                                                                                                                                           | Dronedarone                    |
|                        |                                                                                                                                           | Digoxin                        |
|                        |                                                                                                                                           | Nifedipine                     |
|                        |                                                                                                                                           | Spirolactone                   |
| Central nervous system | Tertiary TCAs, alone or in combination                                                                                                    | Amitriptyline                  |
|                        |                                                                                                                                           | Chlordiazepoxide-amitriptyline |
|                        |                                                                                                                                           | Clomipramine                   |
|                        |                                                                                                                                           | Doxepin                        |
|                        |                                                                                                                                           | Imipramine                     |
|                        |                                                                                                                                           | Perphenazine-amitriptyline     |
|                        |                                                                                                                                           | Trimipramine                   |
|                        | Antipsychotics, first (conventional) and second (atypical) generation (see Table 8 from the 2012 Beers report for full list of chemicals) | Chlorpromazine                 |
|                        |                                                                                                                                           | Fluphenazine                   |
|                        |                                                                                                                                           | Haloperidol                    |
|                        |                                                                                                                                           | Loxapine                       |
|                        |                                                                                                                                           | Molindone                      |
|                        |                                                                                                                                           | Perphenazine                   |
|                        |                                                                                                                                           | Pimozide                       |
|                        |                                                                                                                                           | Promazine                      |
|                        |                                                                                                                                           | Thioridazine                   |
|                        |                                                                                                                                           | Thiothixene                    |
|                        |                                                                                                                                           | Trifluoperazine                |
|                        |                                                                                                                                           | Triflupromazine                |
|                        |                                                                                                                                           | Aripiprazole                   |
|                        |                                                                                                                                           | Asenapine                      |
|                        |                                                                                                                                           | Clozapine                      |
|                        |                                                                                                                                           | Iloperidone                    |
|                        |                                                                                                                                           | Lurasidone                     |
|                        |                                                                                                                                           | Olanzapine                     |
|                        |                                                                                                                                           | Paliperidone                   |
|                        |                                                                                                                                           | Quetiapine                     |
|                        | Risperidone                                                                                                                               |                                |
|                        | Ziprasidone                                                                                                                               |                                |
|                        |                                                                                                                                           | Thioridazine                   |
|                        | Mesoridazine                                                                                                                              |                                |
| Barbiturates           | Amobarbital                                                                                                                               |                                |
|                        | Butabarbital                                                                                                                              |                                |
|                        | Butalbital                                                                                                                                |                                |
|                        | Mephobarbital                                                                                                                             |                                |
|                        | Pentobarbital                                                                                                                             |                                |
|                        | Phenobarbital                                                                                                                             |                                |
|                        | Secobarbital                                                                                                                              |                                |

|                             |                                                 |                                      |
|-----------------------------|-------------------------------------------------|--------------------------------------|
|                             | Benzodiazepines (short and intermediate acting) | Alprazolam                           |
|                             |                                                 | Estazolam                            |
|                             |                                                 | Lorazepam                            |
|                             |                                                 | Oxazepam                             |
|                             |                                                 | Temazepam                            |
|                             |                                                 | Triazolam                            |
|                             | Benzodiazepines (long acting)                   | Clorazepate                          |
|                             |                                                 | Chlordiazepoxide                     |
|                             |                                                 | Chlordiazepoxide-amitriptyline       |
|                             |                                                 | Clidinium-chlordiazepoxide           |
|                             |                                                 | Clonazepam                           |
|                             |                                                 | Diazepam                             |
|                             |                                                 | Flurazepam                           |
|                             |                                                 | Quazepam                             |
|                             |                                                 | Chloral hydrate                      |
|                             | Meprobamate                                     |                                      |
| Nonbenzodiazepine hypnotics | Eszopiclone                                     |                                      |
|                             | Zolpidem                                        |                                      |
|                             | Zaleplon                                        |                                      |
|                             | Ergot mesylates                                 |                                      |
|                             | Isoxsuprine                                     |                                      |
| Endocrine                   | Androgens                                       | Methyltestosterone                   |
|                             |                                                 | Testosterone                         |
|                             |                                                 | Desiccated thyroid                   |
|                             |                                                 | Estrogens with or without progestins |
|                             |                                                 | Growth hormone                       |
|                             |                                                 | Insulin                              |
|                             |                                                 | Megestrol                            |
|                             | Sulfonylureas, long duration                    | Chlorpropamide                       |
| Glyburide                   |                                                 |                                      |
| Gastrointestinal            |                                                 | Metoclopramide                       |
|                             |                                                 | Mineral oil                          |
|                             |                                                 | Trimethobenzamide                    |
| Pain                        |                                                 | Meperidine                           |
|                             | Non-COX-selective NSAIDs, oral                  | Aspirin                              |
|                             |                                                 | Diclofenac                           |
|                             |                                                 | Diflunisal                           |
|                             |                                                 | Etodolac                             |
|                             |                                                 | Fenoprofen                           |
|                             |                                                 | Ibuprofen                            |
|                             |                                                 | Ketoprofen                           |
| Meclofenamate               |                                                 |                                      |

|                           |                                |
|---------------------------|--------------------------------|
|                           | Mefenamic acid                 |
|                           | Meloxicam                      |
|                           | Nabumetone                     |
|                           | Naproxen                       |
|                           | Oxaprozin                      |
|                           | Piroxicam                      |
|                           | Sulindac                       |
|                           | Tolmetin                       |
|                           | Indomethacin                   |
|                           | Ketorolac, includes parenteral |
|                           | Pentazocine                    |
| Skeletal muscle relaxants | Carisoprodol                   |
|                           | Chlorzoxazone                  |
|                           | Cyclobenzaprine                |
|                           | Metaxalone                     |
|                           | Methocarbamol                  |
|                           | Orphenadrine                   |
